# Supplementary material for: Stochastic yield catastrophes and robustness in self-assembly
Source: eLife journal article supplement (doi:10.7554/elife.51020), 2020-02-05
Supplement: supp [file elife-51020-supp-v1.zip]

Archive with 5 entries (5 files):
- elife_poa_e51020_Source_code_4.zip
- elife_poa_e51020_Source_code_1.zip
- elife_poa_e51020_Source_code_3.zip
- elife_poa_e51020_Source_code_2.zip
- elife_poa_e51020_Transparent_Reporting_File.pdf
